# Supplementary material for: TAMSAT-ALERT v1: a new framework for agricultural decision support
Source: Copernicus journal article supplement (doi:10.5194/gmd-11-2353-2018), 2018-06-19
Supplement: Supplementary file [file gmd-11-2353-2018-supplement-title-page.pdf › gmd-11-2353-2018-supplement-title-page.pdf]

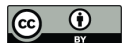

## *Supplement of*

# **TAMSAT-ALERT v1: a new framework for agricultural decision support**

**Dagmawi Asfaw et al.**

*Correspondence to:* Dagmawi Asfaw (d.t.asfaw@pgr.reading.ac.uk)

- [gmd-11-2353-2018-supplement-title-page.pdf](#)
- [Supplementary\\_information](#)
  - [TAMSAT-ALERT\\_user\\_guide.pdf](#)
  - [supplementary\\_information.pdf](#)

The copyright of individual parts of the supplement might differ from the CC BY 4.0 License.
